# Supplementary material for: Green Processing, Germinating and Wet Milling Brown Rice (Oryza sativa) for Beverages: Physicochemical Effects
Source: MDPI journal article supplement (doi:10.3390/foods9081016), 2020-07-29
Supplement: s1 [file s1]

**Table 1.** Optimized “free-flowing” processing parameters for preparing freshly dehulled sprouted, softened, wet milled, gelatinized and enzyme treated brown rice beverages. [Previously published, (Beaulieu et al., 2020); <https://onlinelibrary.wiley.com/doi/10.1002/fsn3.1534>].

| Processing Steps                | Treatment Code | Conditions                                       | Optimized Method      |
|---------------------------------|----------------|--------------------------------------------------|-----------------------|
| Controls                        | WR or BRR †    | White rice, or freshly dehulled brown Rondo rice | Not applicable        |
| Rinsing                         | Rinses ‡       | Ambient temperature, or designated per below     | 30 min                |
| Soaking                         |                | Temperature                                      | 35 °C                 |
|                                 |                | Temperature of added H <sub>2</sub> O            | 35 °C                 |
| Sprouting                       | GBR            | Time                                             | 24 hours              |
|                                 |                | Ratio (rice:water, g/g)                          | 1:1                   |
|                                 |                | Rinsed, replaced                                 | Every 4 hours         |
|                                 |                | Temperature                                      | 35 °C                 |
|                                 |                | Rinsed                                           | Every 4 hours         |
| Softening                       | (none)         | Temperature rinse H <sub>2</sub> O               | 35 °C                 |
|                                 |                | Time                                             | 24 hours              |
|                                 |                | Temperature                                      | 70 °C max             |
|                                 |                | Temperature of added H <sub>2</sub> O            | < 75 °C               |
| Wet Milling                     | PWM            | Times §                                          | 60 to 120 min         |
|                                 |                | Ratio (rice:water, wt/wt) ¶                      | 1:2                   |
|                                 |                | Temperature                                      | ~65 °C (70 °C max)    |
|                                 |                | Temperature of added H <sub>2</sub> O            | ~< 75 °C              |
|                                 |                | Milling time                                     | 2 min                 |
| Gelatinization Enzymes & Dosage | Gelat          | Sum ratio (rice:water)                           | 1:4                   |
|                                 |                | Temperature                                      | 80 °C                 |
|                                 | PNZ            | α-amylase                                        | 300 μL / 100 g starch |
|                                 |                | Glucoamylase                                     | 300 μL / 100 g starch |

† Acronyms for treatments are: WR, white rice; BRR, brown Rondo rice; GBR, germinated brown rice; PWM, post wet milling and PNZ, post saccharification enzymes. ‡ Rinses included: Water rinse (Rinse); 30 and 300 ppm peracetic acid. § Trial times between 60-120 min due to differences in volumes, beaker sizes, number of units run simultaneously and differences in heat energy transfer to soften kernels, as based upon a subjective softness test with a stainless steel spatula on a stainless steel table. ¶ Considered on a dry weight basis (dwb) even though kernels had absorbed water weight. Based upon original grams rice to grams water utilized.

**Table 2.** Informal sensory appraisal<sup>(†)</sup> of four anonymous commercial rice beverages (CRB).

| Sensory category  | Descriptor      | CRB#1 BR ‡, not fortified |   |       | CRB#2 Sprouted, fortified |   |       | CRB#3 BR, fortified |   |       | CRB#4 BR, fortified |   |       |
|-------------------|-----------------|---------------------------|---|-------|---------------------------|---|-------|---------------------|---|-------|---------------------|---|-------|
|                   |                 | Average                   | ± | stdev | Average                   | ± | stdev | Average             | ± | stdev | Average             | ± | stdev |
| Aroma             | Pleasant        | 2.25                      | ± | 0.50  | 1.50                      | ± | 0.58  | 2.50                | ± | 0.58  | 2.00                | ± | 0.63  |
|                   | Nutty           | 1.40                      | ± | 0.89  | 1.80                      | ± | 0.84  | 1.33                | ± | 0.52  | 1.20                | ± | 0.45  |
|                   | Carmel          | 1.33                      | ± | 0.52  | 1.00                      | ± | ---   | 1.17                | ± | 0.41  | 1.00                | ± | ---   |
| Taste             | Starchy         | 1.67                      | ± | 0.52  | 1.83                      | ± | 0.41  | 1.60                | ± | 0.55  | 1.67                | ± | 0.82  |
|                   | Sweetness       | 2.29                      | ± | 0.76  | 1.33                      | ± | 0.52  | 2.29                | ± | 0.76  | 2.57                | ± | 0.53  |
|                   | Beany           | 1.50                      | ± | 0.84  | 1.60                      | ± | 0.89  | 1.40                | ± | 0.55  | 1.67                | ± | 0.82  |
|                   | Hay             | 1.00                      | ± | 0.00  | 1.00                      | ± | ---   | 1.20                | ± | 0.45  | 1.17                | ± | 0.41  |
|                   | Salty           | 1.50                      | ± | 0.84  | 1.33                      | ± | 0.52  | 1.40                | ± | 0.55  | 1.00                | ± | ---   |
|                   | Sour/Bitterness | 1.40                      | ± | 0.55  | 1.33                      | ± | 0.52  | 1.20                | ± | 0.45  | 1.50                | ± | 0.84  |
|                   | Grassy          | 1.00                      | ± | ---   | 1.20                      | ± | 0.45  | 1.20                | ± | 0.45  | 1.00                | ± | ---   |
| Mouthfeel texture | Chalkiness      | 1.00                      | ± | 0.00  | 1.60                      | ± | 0.55  | 1.40                | ± | 0.55  | 1.50                | ± | 0.84  |
|                   | Mouth coating   | 1.67                      | ± | 0.52  | 1.00                      | ± | 0.00  | 1.33                | ± | 0.52  | 1.50                | ± | 0.84  |
|                   | Viscous         | 1.00                      | ± | 0.00  | 1.33                      | ± | 0.52  | 1.33                | ± | 0.52  | 1.17                | ± | 0.41  |
|                   | Creamy          | 1.40                      | ± | 0.55  | 1.00                      | ± | ---   | 1.86                | ± | 0.69  | 2.14                | ± | 0.69  |
|                   | Gritty          | 1.00                      | ± | ---   | 1.00                      | ± | ---   | 1.00                | ± | ---   | 1.00                | ± | ---   |

<sup>†</sup> Informal sensory appraisal was accomplished by seven in-house scientists, some formally trained and coaching the session, using a 0 - 3 scale where 0 was no response, 1 = low, 2 = medium and 3 = high. Saltines were used between randomized 3-digit coded samples, as well as fresh water rinsing and expectoration. Averages (± standard deviations) include only positive responses from the 1-3 scale, with 0's (no response) removed.

<sup>‡</sup> Acronyms for commercial rice beverages treatments were: CRB#1, not enriched (un-fortified) brown rice (BR) beverage; CRB#2, a “sprouted”, unsweetened, fortified brown rice beverage; CRB#3 and CRB#4 were unsweetened, fortified brown rice beverages. Ingredient labels indicated no exogenously added sugar (unless labeling caveats allow inclusion of “rice syrup” or “rice syrup solids” as part of the “brown rice”). The nutrition labels indicated from <1 to 10g sugars. However, soluble solids analyses indicated from 6.0 - 10.8 °Brix (Beaulieu et al., 2020). According to the ingredient labels, no gums like gellan or gum Arabic were added in these commercial samples, and all had added plant oils.

**Table 3.** Individual  $\gamma$ -aminobutyric acid (mg/g) and phenolics means (GAE, mg/g) in repeated independent experiments assessing the effects of germinating and processing brown Rondo rice into beverages.

| Trial | BRR †       |             | GBR         |                      | PWM         |             |
|-------|-------------|-------------|-------------|----------------------|-------------|-------------|
|       | GABA        | Phenolics   | GABA        | Phenolics            | GABA        | Phenolics   |
| 1     | 0.41 ± 0.07 | 6.55 ± 1.07 | 0.52 ± 0.10 | 8.05 ± 0.44          | 0.39 ± 0.03 | 9.17 ± 1.17 |
| 2     | 0.36 ± 0.06 | 7.21 ± 0.48 | 0.42 ± 0.17 | 7.52 ± 0.45          | 0.40 ± 0.01 | 8.30 ± 0.38 |
| 3     | 0.47 ± 0.12 | 9.05 ± 2.41 | 0.53 ± 0.07 | <u>8.29 ± 2.39</u> ‡ | 0.39 ± 0.02 | 7.15 ± 0.40 |
| 4     | 0.41 ± 0.07 | 7.87 ± 0.90 | 0.49 ± 0.16 | 9.38 ± 1.37          | 0.39 ± 0.06 | 8.64 ± 2.31 |

† Acronyms for rice type and treatments are: BRR, brown Rondo rice; GBR, germinated brown rice; PWM, post wet milling; GABA,  $\gamma$ -aminobutyric acid, and phenolics or “total phenolics” by Folin-Ciocalteu method.

‡ Italicized and underlined mean for phenolics indicate an independent trial that did not follow the normal trend whereby GBR > BRR. All averages were from n=3 replicates from independent experimental units, ± standard deviation.

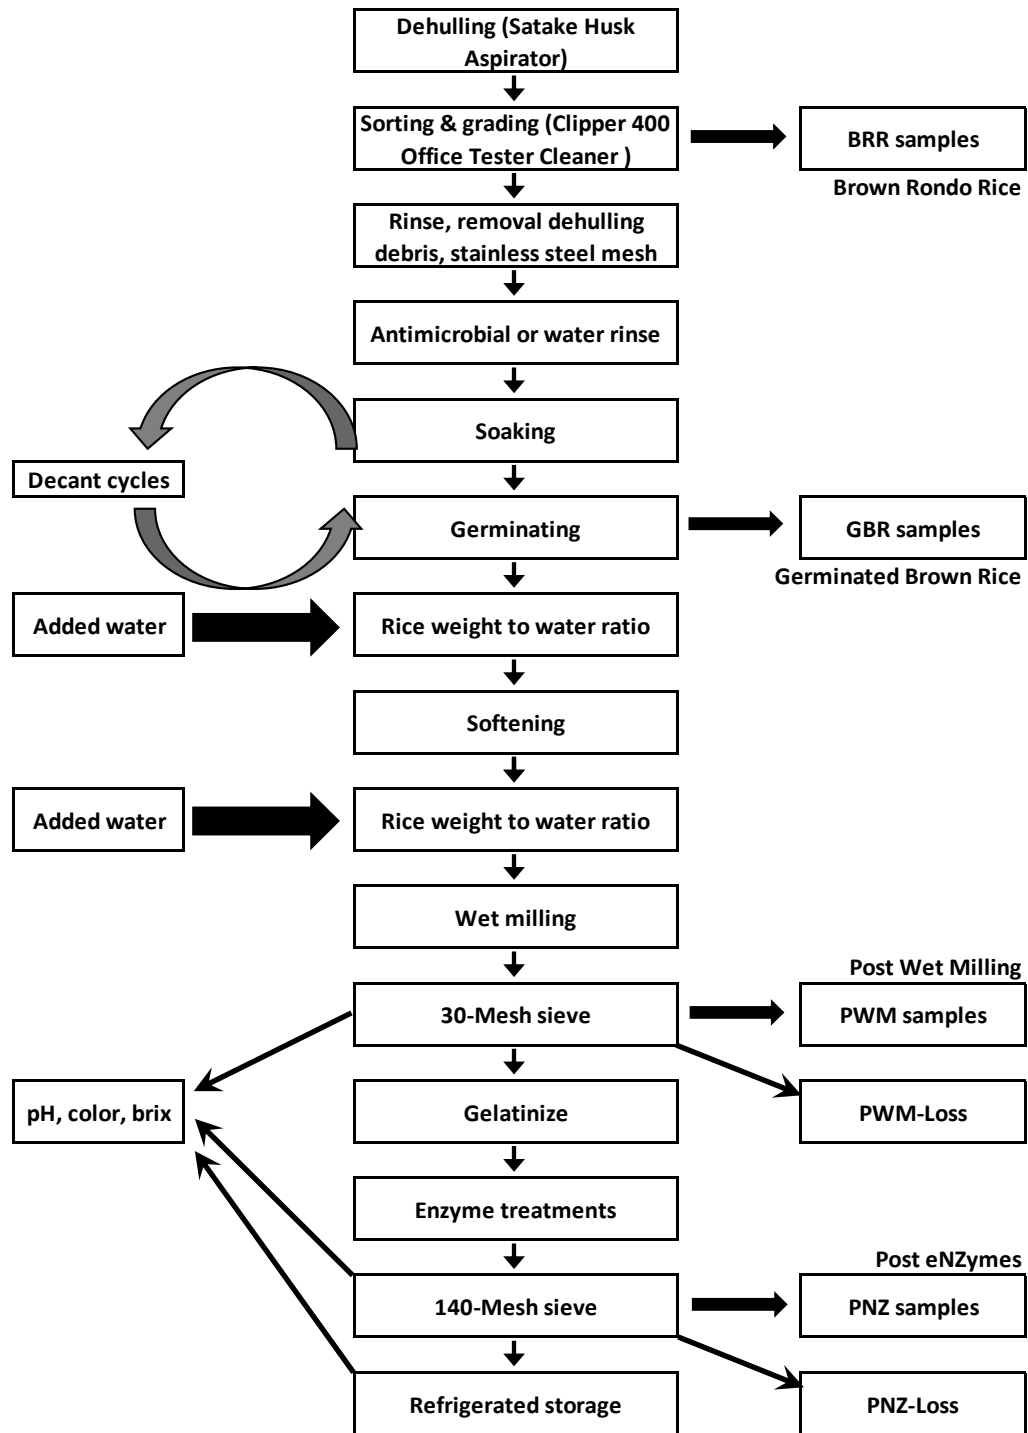

**Figure 1.** Empirically deduced optimized germinated brown rice “free-flowing” processing protocol and sampling regime. [Previously published, (Beaulieu et al., 2020); <https://onlinelibrary.wiley.com/doi/10.1002/fsn3.1534>].

## Reference

1. Beaulieu J.C., S Reed, J.M. Obando-Ulloa and A.M. McClung. 2020. Green processing protocol for germinating and wet milling brown rice beverage formulations: Sprouting, milling and gelatinization effects. *Food Sci & Nutr.* 2020(8):2445-2457.
